# Supplementary material for: Geometric properties of nucleic acids with potential for autobuilding
Source: PubMed Central journal article supplement (PMC3006036; doi:10.1107/s0108767310039140), 2010-11-11
Supplement: a-67-00001-sup1.pdf [file a-67-00001-sup1.pdf]

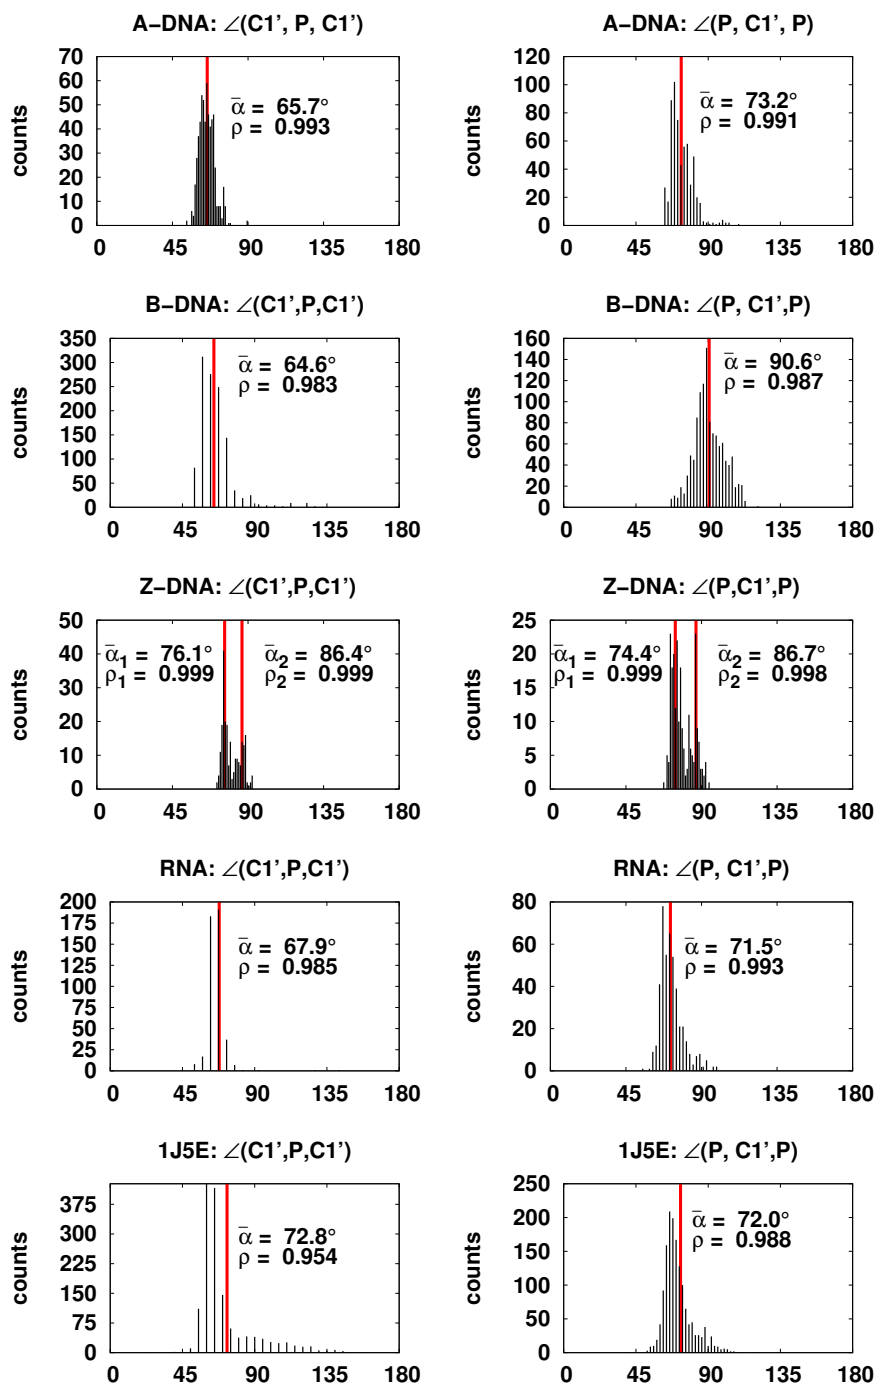

Figure 1: Distribution of the (C1'-P-C1') (left) and (P-C1'-P) (right) angle for RNA and DNA corresponding to Table 4. See section 3 for details about the parameters  $\bar{\alpha}$  and  $\rho$ . 1J5E is the PDB-ID of the 30S ribosomal subunit determined at 3.05 Å resolution and shown for comparison with the RNA histograms.

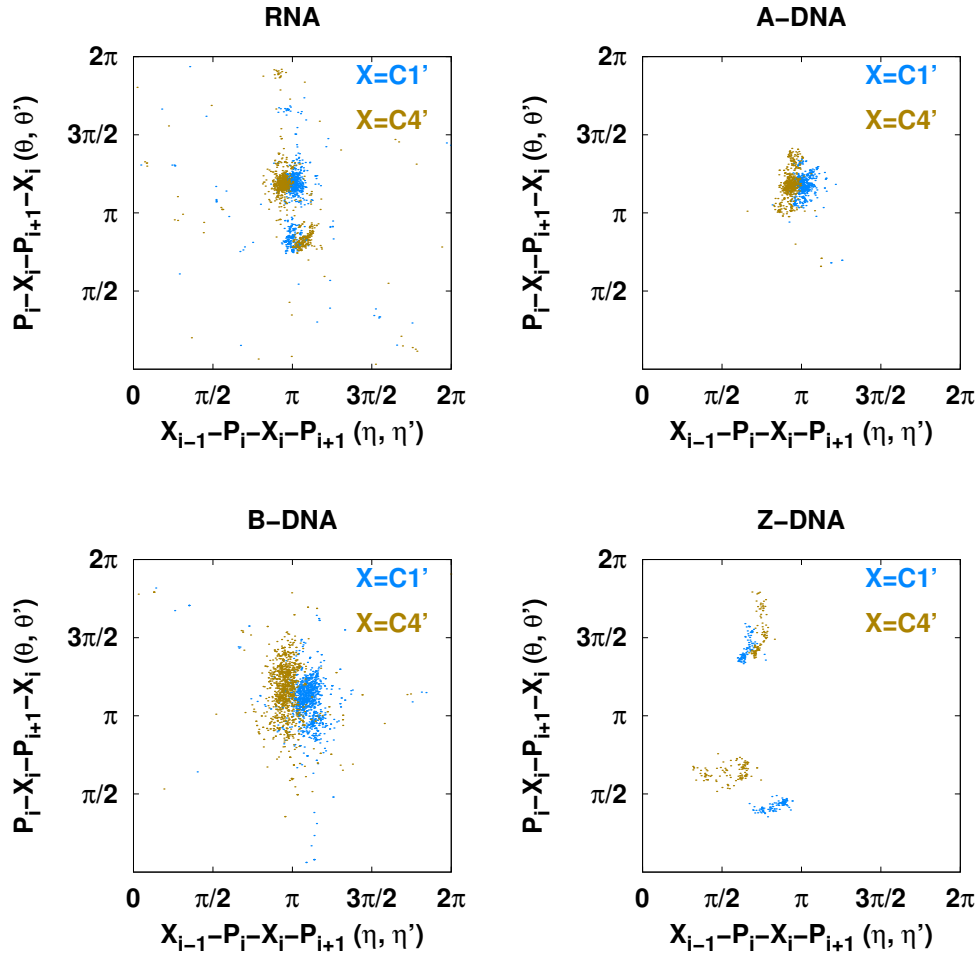

Figure 2: Comparison between the  $\eta, \theta$  plot based on  $C4'$  (brown) suggested by Wadley *et al.* (2007) and the  $\eta', \theta'$  plot based on  $C1'$  (blue). It can be seen in each plot that the distribution based in  $C1'$  is similar to the distribution based on  $C4'$ , especially with respect to the spread. These distributions can be used to score the quality of a backbone trace.
